# Supplementary material for: Expression of the Major and Pro-Oncogenic H3K9 Lysine Methyltransferase SETDB1 in Non-Small Cell Lung Cancer
Source: PubMed Central journal article supplement (PMC6721806; doi:10.3390/cancers11081134), 2019-08-08

# Supplementary Materials: Expression of The Major and Pro-Oncogenic H3K9 Lysine Methyltransferase SETDB1 in Non-Small Cell Lung Cancer: A Systematic Review of the Literature and Meta-Analysis

Paola CRUZ-TAPIAS, Vlada ZAKHAROVA, Oscar M. PEREZ-FERNANDEZ, William MANTILLA, Sandra RAMÍREZ-CLAVIJO and Slimane AIT-SI-ALI

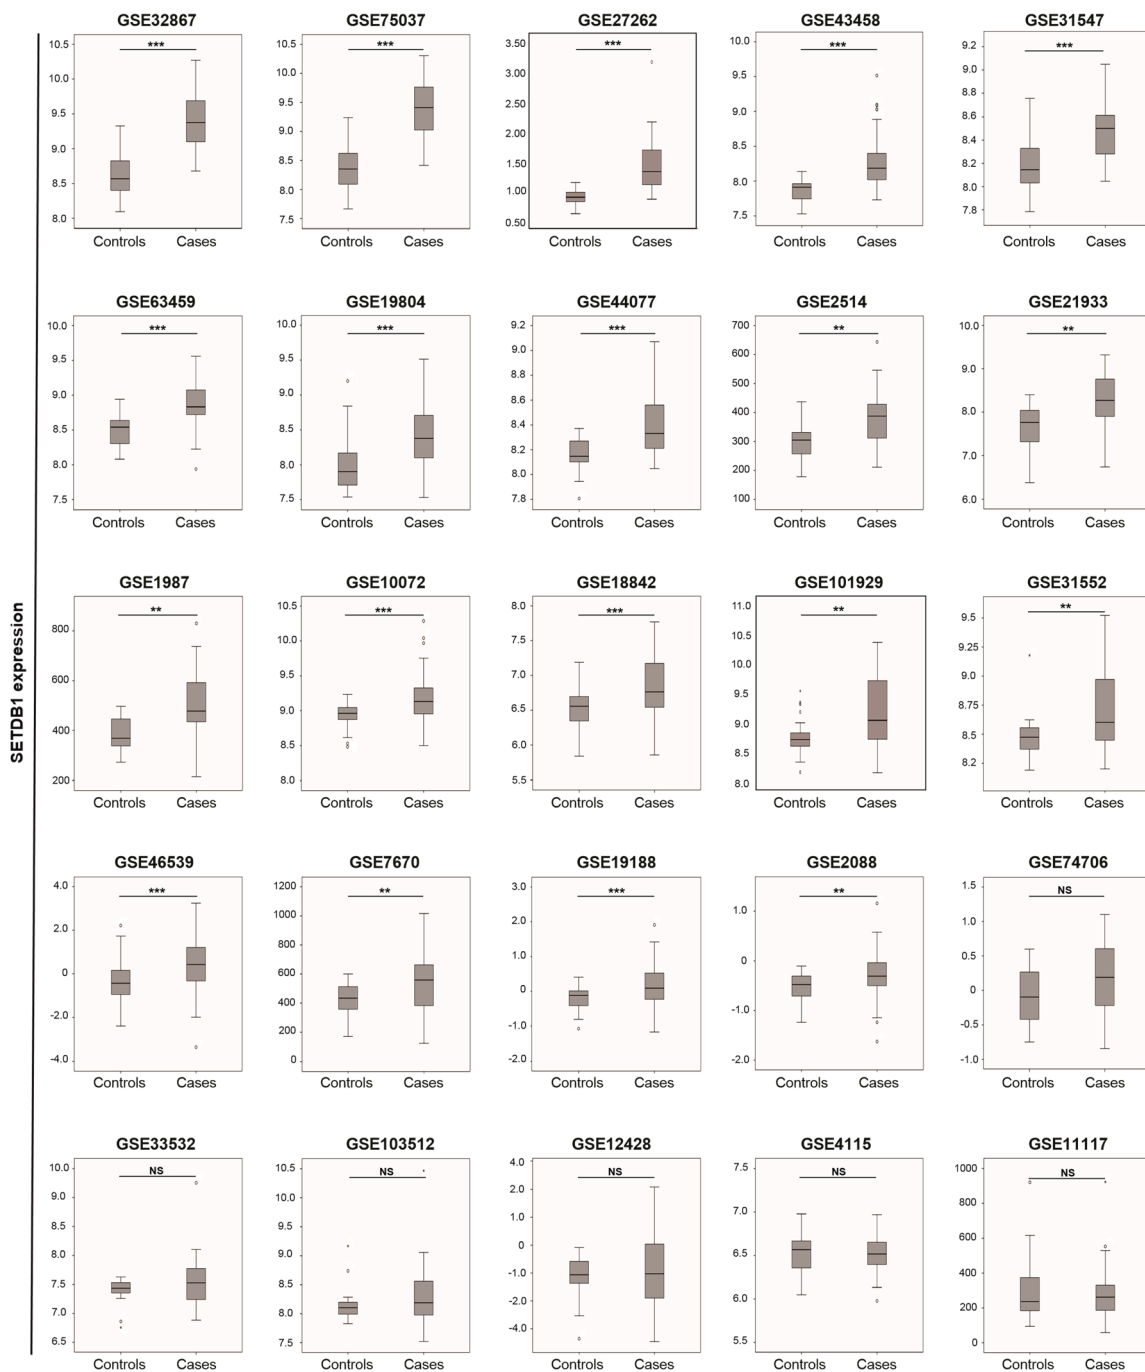

**Figure 1.** Box plots displaying the expression levels of *SETDB1* mRNA between NSCLC and non-tumor samples for each GEO dataset.

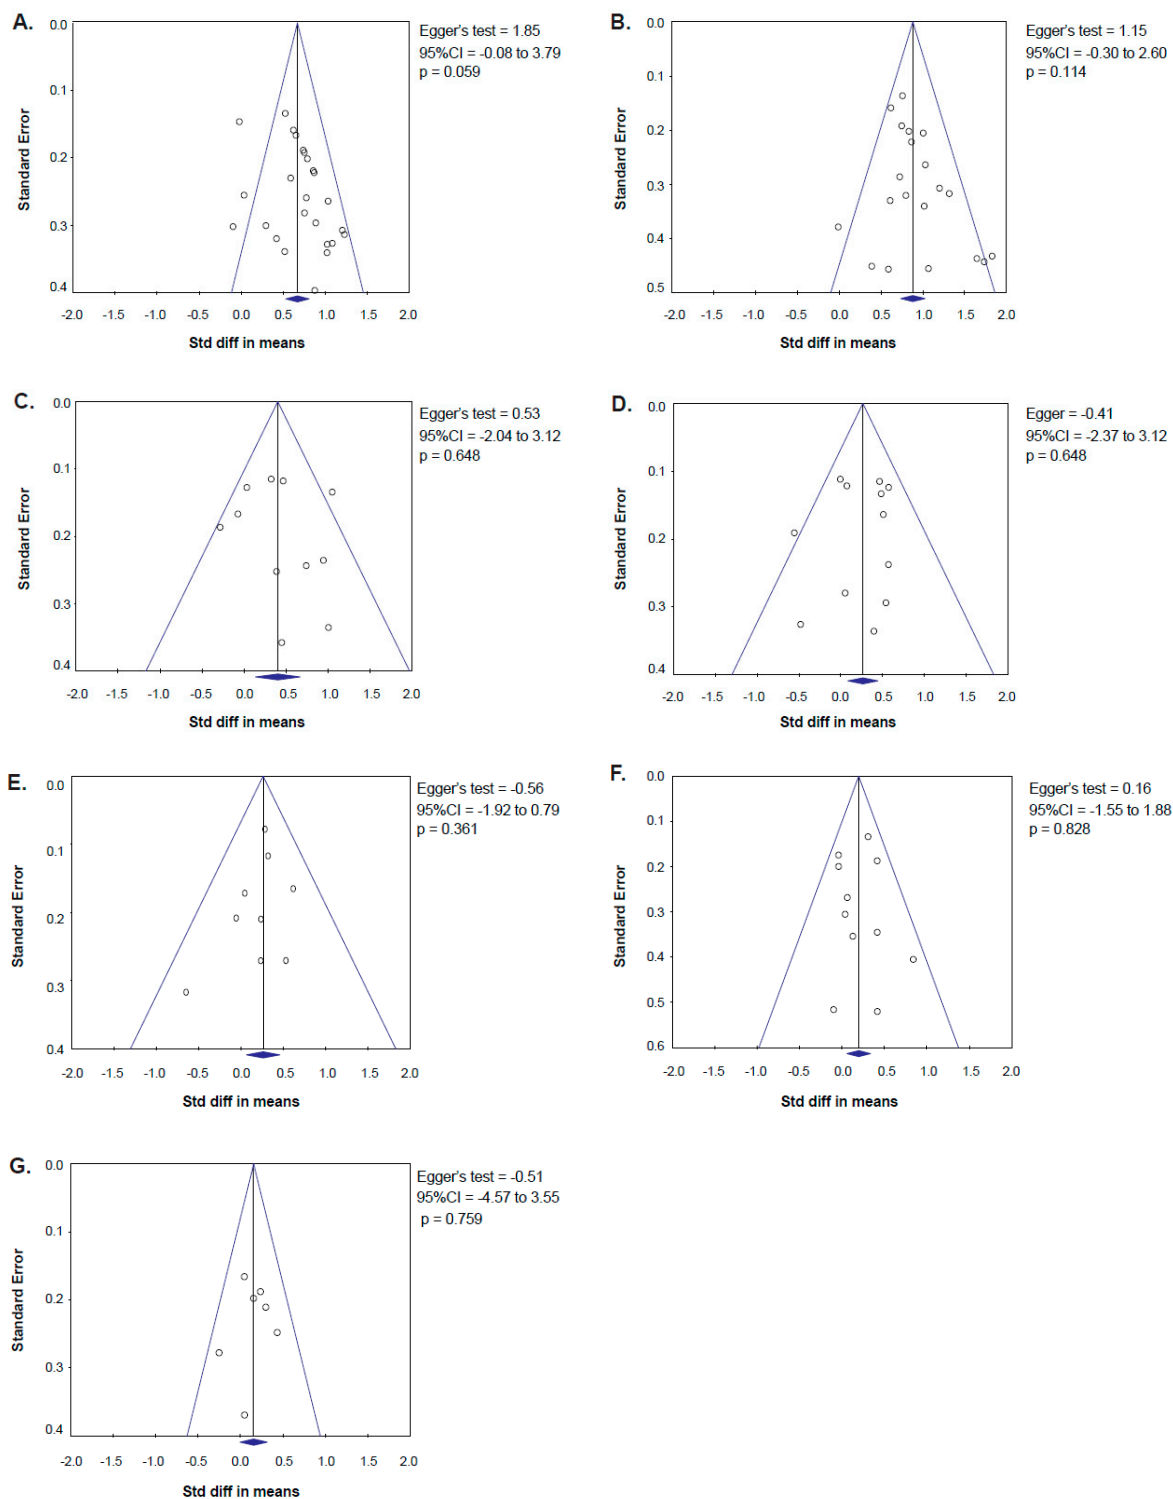

**Figure S2.** Funnel plots for main meta-analyses performed. (A) Association between *SETDB1* mRNA level and NSCLC. (B) Association between *SETDB1* mRNA level and ADC. (C) Association between *SETDB1* mRNA level and SCC. (D) Association between *SETDB1* expression in current smokers compared to NSCLC non-smoker patients. (E) Association between *SETDB1* mRNA level in former smokers compared to NSCLC non-smoker patients. (F) Association between *SETDB1* mRNA level in smokers compared to non-smoker NSCLC patients. (G) Association between *SETDB1* mRNA level and NSCLC patients carrying mutations for *TP53* gene.

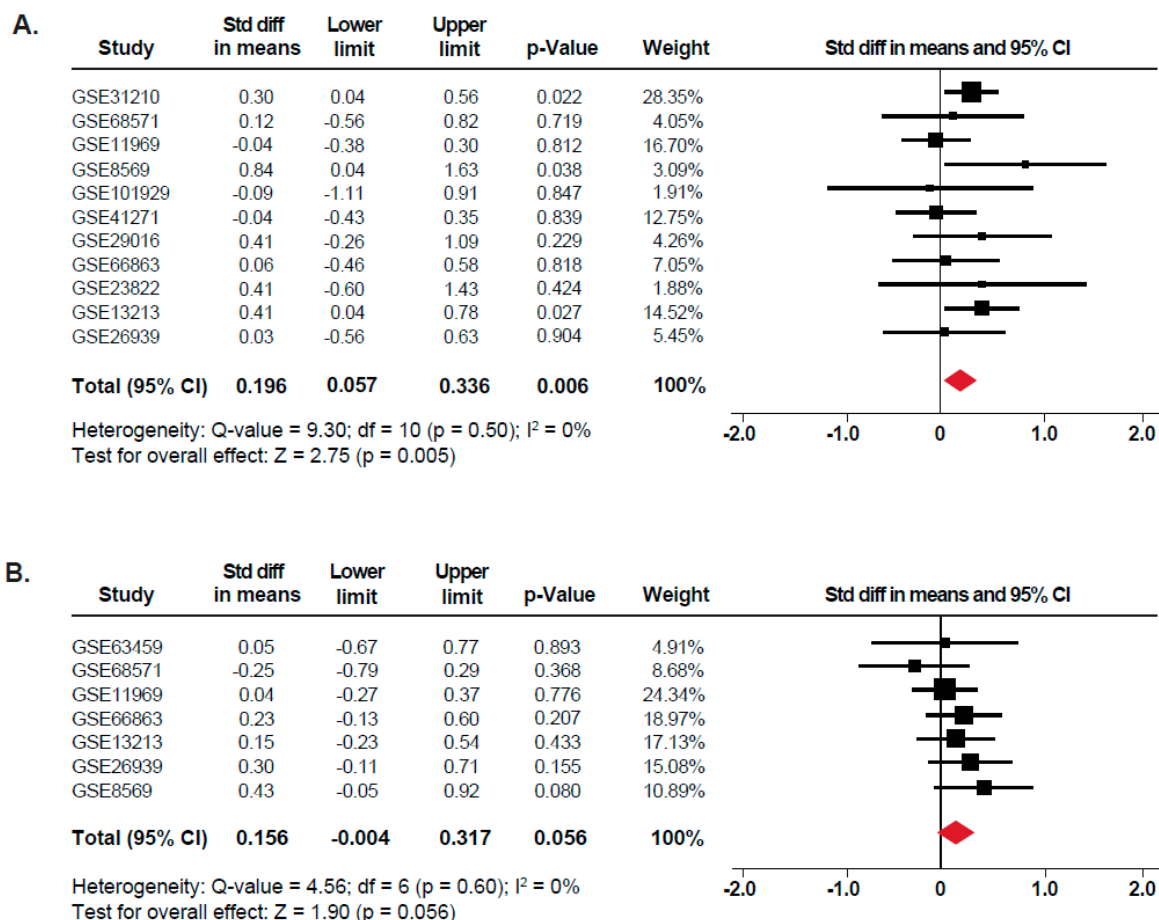

**Figure S3.** (A) Forest plot of the association of *SETDB1* mRNA level with NSCLC patients reported as smokers compared to non-smoker patients. (B) Forest plot of association between *SETDB1* mRNA level and NSCLC patients carrying mutations for *TP53* gene.

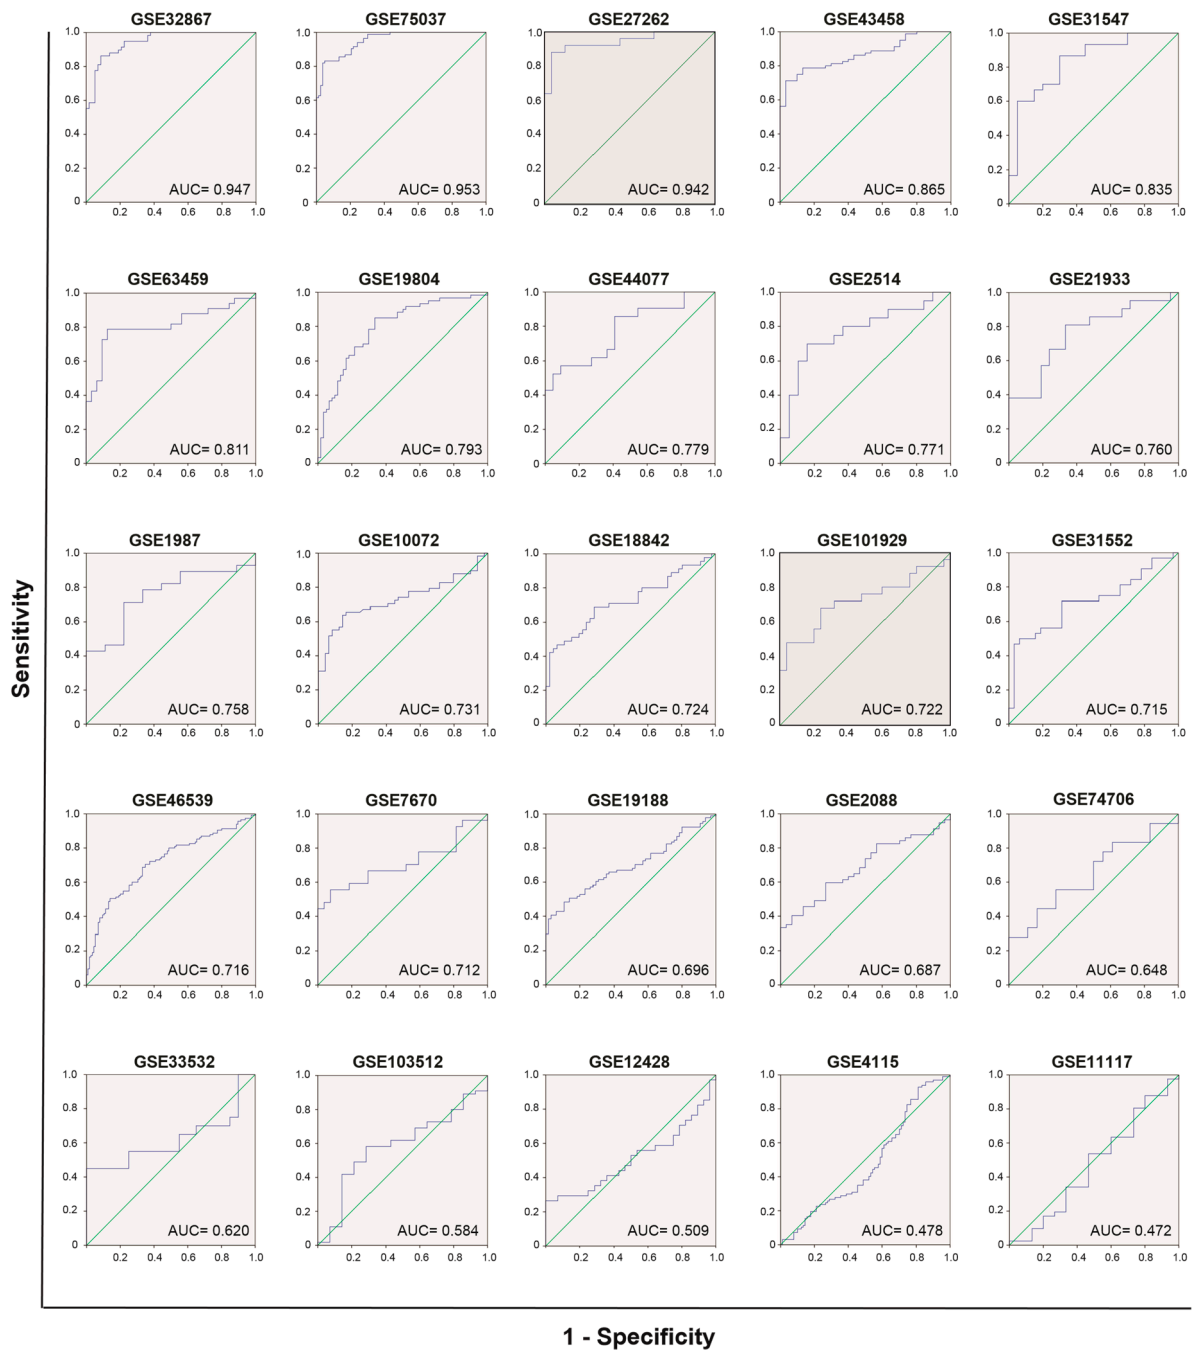

**Figure S4.** Individual ROC curves showing discriminative yield of *SETDB1* mRNA level for NSCLC for each GEO dataset. AUC: area under the curve.

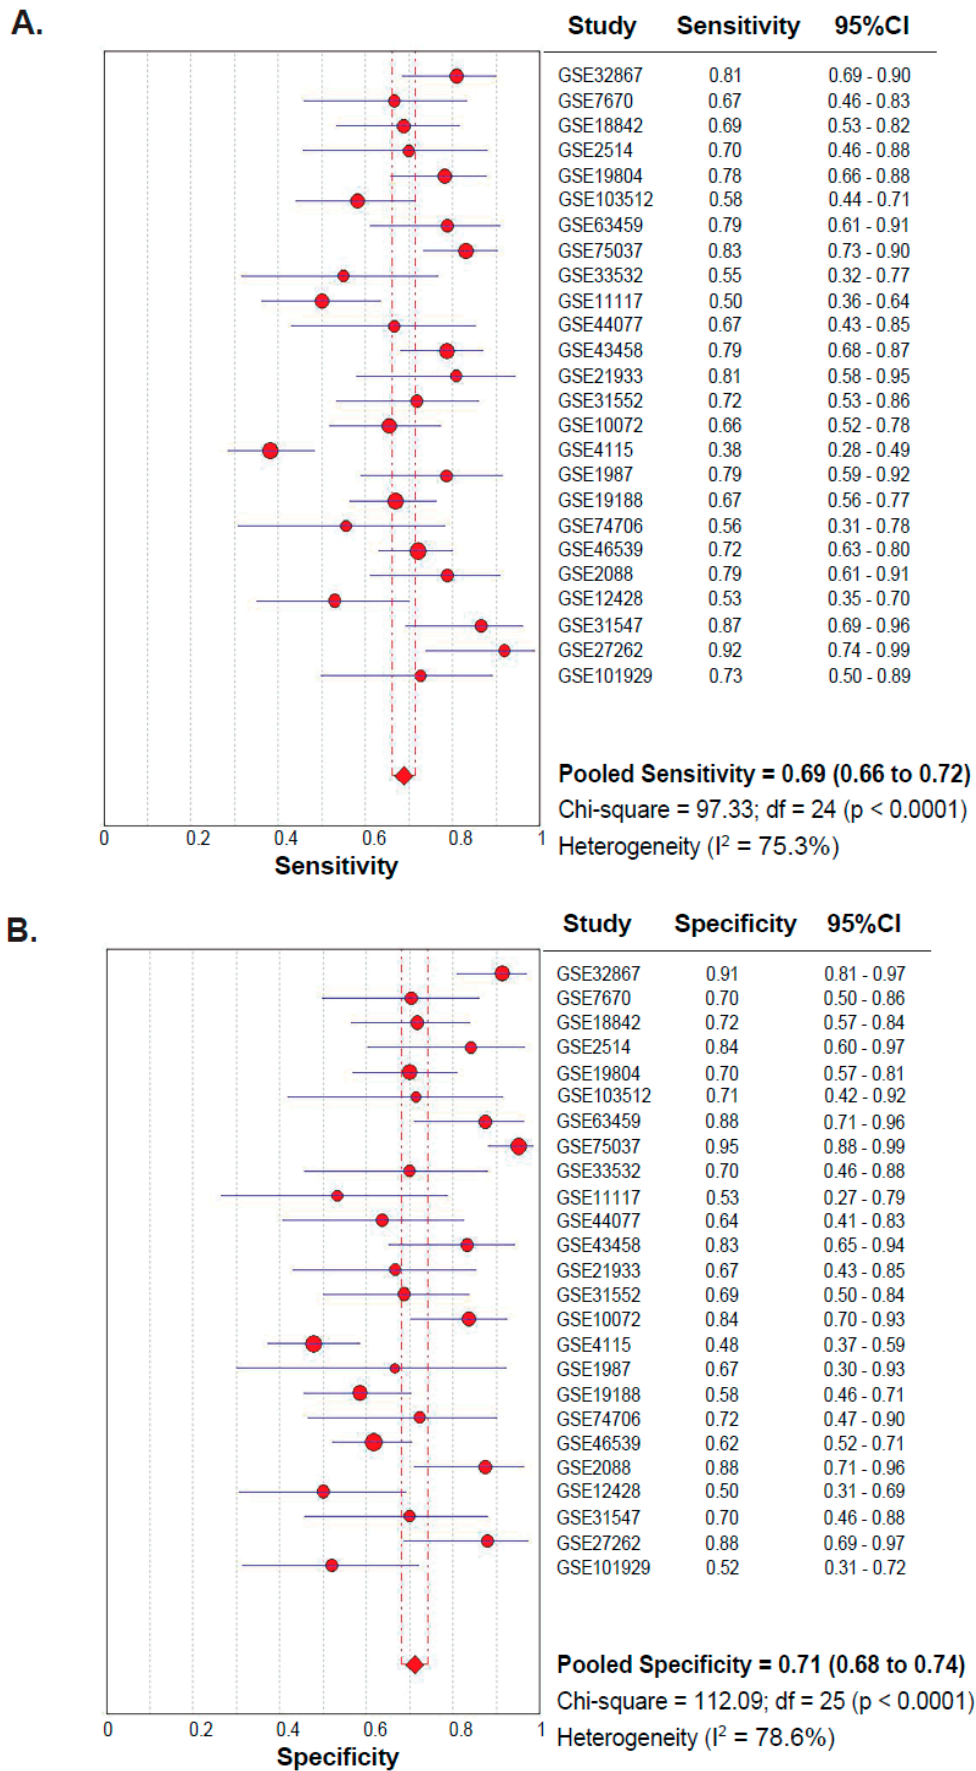

**Figure S5.** The combined sensitivity and specificity showing moderate discriminative yield of SETDB1 mRNA expression for NSCLC. (A) Sensitivity analysis. (B) Specificity analysis.

### Workflow of the study selection

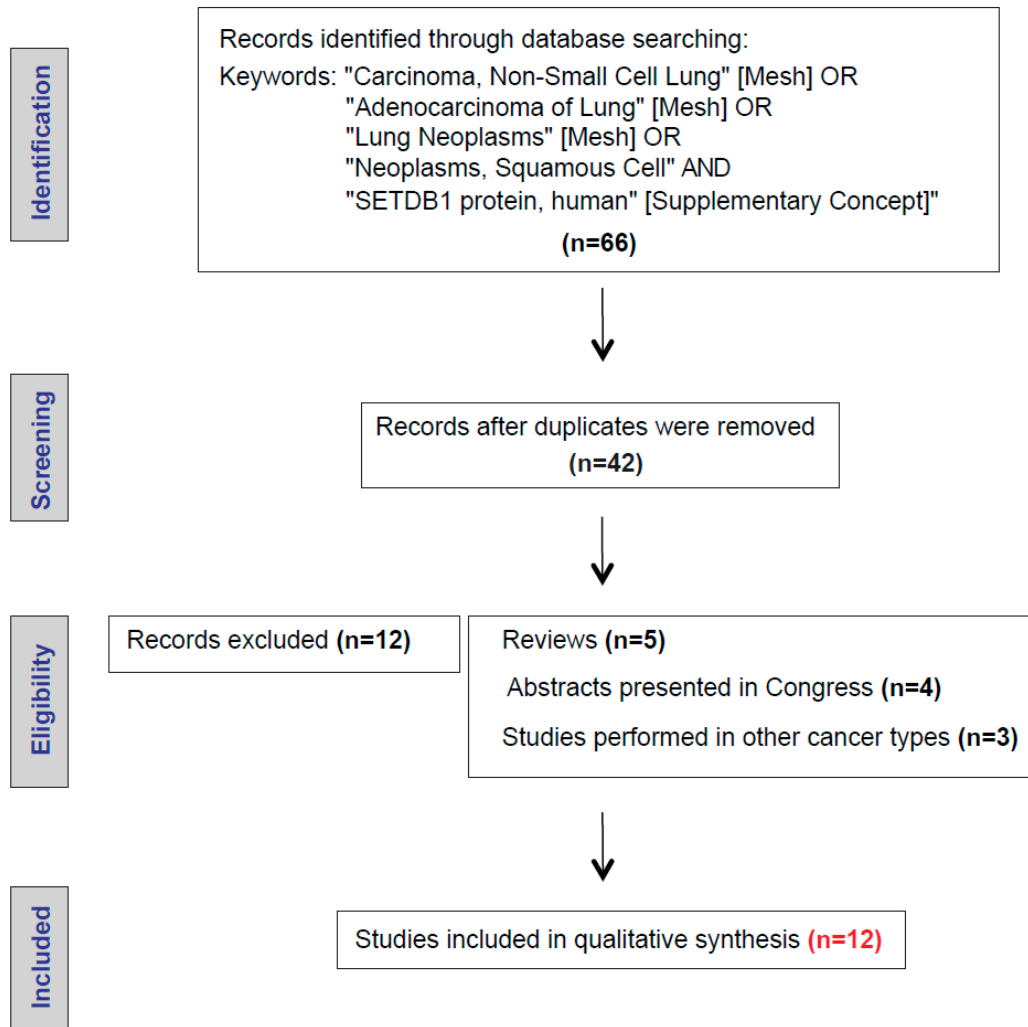

**Figure S6.** Workflow of the study selection for qualitative synthesis.

**Table S1.** Overview of additional datasets selected from GEO for clinico-pathological analyses.

| GEO Dataset | Country   | Year | ADC | SCC | NSCLC | Sample Type Patients | Platform                                                  | SETDB1 ID    | Reference     |
|-------------|-----------|------|-----|-----|-------|----------------------|-----------------------------------------------------------|--------------|---------------|
| GSE31210    | Japan     | 2012 | 226 |     |       | Cancer tissue        | Affymetrix Human Genome U133 Plus 2.0 Array               | 203155_at    | [1]           |
| GSE68571    | USA       | 2002 | 86  |     |       | Cancer tissue        | Affymetrix Human Full Length HuGeneFL Array               | D31891_at    | [2]           |
| GSE11969    | Japan     | 2006 | 94  | 35  |       | Cancer tissue        | Agilent Homo sapiens 21.6K custom array                   | A_23_P126398 | [3]           |
| GSE8569     | Spain     | 2008 | 30  | 36  |       | Cancer tissue        | CNIO Human Oncochip 2.0                                   | 20543        | [4]           |
| GSE47115    | USA       | 2014 |     |     | 46    | Cancer tissue        | Illumina HumanHT-12 WG-DASL V4.0 R2 expression beadchip   | ILMN_1718207 | [5]           |
| GSE41271    | USA       | 2013 | 183 | 80  | 1     | Cancer tissue        | Illumina HumanWG-6 v3.0 expression beadchip               | ILMN_1718207 | [6–9]         |
| GSE50081    | Canada    | 2014 | 127 | 43  |       | Cancer tissue        | Affymetrix Human Genome U133 Plus 2.0 Array               | 203155_at    | [10]          |
| GSE68465    | USA       | 2008 | 443 |     |       | Cancer tissue        | Affymetrix Human Genome U133A Array                       | 203155_at    | [11]          |
| GSE29016    | Sweden    | 2012 | 38  | 12  |       | Cancer tissue        | Illumina HumanHT-12 V3.0 expression beadchip              | ILMN_1718207 | [12]          |
| GSE66863    | Norway    | 2016 | 121 |     |       | Cancer tissue        | Agilent-028004 SurePrint G3 Human GE 8x60K Microarray     | A_23_P126393 | [13]          |
| GSE23822    | Australia | 2012 |     | 56  |       | Cancer tissue        | Illumina HumanHT-12 V3.0 expression beadchip              | ILMN_1718207 | [14]          |
| GSE68793    | USA       | 2015 |     | 133 |       | Cancer tissue        | Affymetrix HT Human Genome U133A Array                    | 203155_at    | Not published |
| GSE13213    | Japan     | 2009 | 117 |     |       | Cancer tissue        | Agilent-014850 Whole Human Genome Microarray 4x44K G4112F | A_23_P126393 | [15]          |
| GSE26939    | USA       | 2012 | 116 |     |       | Cancer tissue        | Agilent-UNC-custom-4X44K                                  | A_23_P126393 | [16]          |
| GSE14814    | Canada    | 2010 | 71  | 52  |       | Cancer tissue        | Affymetrix Human Genome U133A Array                       | 203155_at    | [17]          |
| GSE37745    | Sweden    | 2017 | 106 | 66  |       | Cancer tissue        | Affymetrix Human Genome U133 Plus 2.0 Array               | 203155_at    | [18]          |
| GSE115458   | Germany   | 2019 | 40  | 30  |       | Cancer tissue        | Affymetrix Human Genome U133 Plus 2.0 Array               | 203155_at    | [19]          |
| GSE29013    | USA       | 2011 | 30  | 25  |       | Cancer tissue        | Affymetrix Human Genome U133 Plus 2.0 Array               | 203155_at    | [20]          |
| GSE67061    | China     | 2015 |     | 69  |       | Cancer tissue        | Agilent-014850 Whole Human Genome Microarray 4x44K G4112F | A_23_P126393 | Not published |
| GSE5123     | Australia | 2007 |     | 51  |       | Cancer tissue        | PRHU05-S1-0006 (PC Human Operon v2 21k)                   | 4.2.19.1     | [21]          |

**Table S2.** Literature review about SETDB1 status in cell lines and xenograft models.

| Study                                     | Study Design, Subjects                                                                                                                                                                                                                      | Main Findings                                                                                                                                                                                                                                                                                                                                                                       | Methods and Analysis                                                                                               | Conclusions                                                                                      |
|-------------------------------------------|---------------------------------------------------------------------------------------------------------------------------------------------------------------------------------------------------------------------------------------------|-------------------------------------------------------------------------------------------------------------------------------------------------------------------------------------------------------------------------------------------------------------------------------------------------------------------------------------------------------------------------------------|--------------------------------------------------------------------------------------------------------------------|--------------------------------------------------------------------------------------------------|
| <b>Watanabe et al. 2008</b> [22]          | NSCLC cell lines: A549, Calu-1, SK-MES-1, SK-LU-1 and SW-900. Immortalized LT-hT NHBE and transformed Ras-LT-hT NHBE cells                                                                                                                  | SETDB1 was upregulated in NSCLC cell lines compared to NHBE cells as well as in immortalized and transformed cell lines. SETDB1 regulated cell proliferation in the colony formation assay and apoptosis immortalized and transformed NHBE cell lines                                                                                                                               | RT-qPCR, ELISA                                                                                                     | SETDB1 plays a role in the oncogenic transformation and immortalization of NHBE cells            |
| <b>Lee et al. 2013</b> [23]               | NSCLC cell lines: H1299, H460, A549                                                                                                                                                                                                         | SETDB1 involved in the regulation of the apoptosis<br>SETDB1 protein levels were reduced in the highly metastatic cell lines but increased in the cell lines with low metastatic potential.                                                                                                                                                                                         | MTT, FACS analysis<br>WB                                                                                           | SETDB1 plays an oncogenic role in lung carcinogenesis                                            |
| <b>Wu et al. 2014</b> [24]                | Sublines of the CL1 lung cancer cell line (ADC)                                                                                                                                                                                             | SETDB1 regulated cellular invasion and the cell metastasis through the direct interaction with SMAD2/3 and regulation of ANXA2 expression.                                                                                                                                                                                                                                          | in vitro migration/invasion assays, xenograft, luciferase reporter assay, WB, ChIP                                 | SETDB1 plays either pro-oncogenic and anti-oncogenic roles of in different stages of lung cancer |
| <b>Rodriguez-Paredes et al. 2014</b> [25] | NSCLC cell lines: A549, NCI-H1299, NCI-H1975, NCI-H1993, NCI-H2170, NCI-H1437 and NCI-H1395. SCLC cell lines: HCC-33, N417, NCI-H446, NCI-H1048, NCI-H1963, NCI-H2029, DMS-114 and DMS-273. Control samples: lung epithelium and leukocytes | SETDB1 gene amplification, mRNA and protein overexpression was found in NCI-H1437, NCI-H1395, DMS-273 cell lines<br>Depletion of SETDB1 expression reduces cancer growth in cell culture and nude mice models, whereas its overexpression increases the tumor invasiveness<br>SETDB1 promoted anchorage-independent growth of NSCLC cell lines and stimulates tumor growth in mice. | FISH, qPCR, WB<br>Colony formation assay, xenograft, matrigel invasion assay<br>Colony formation assay, xenografts | SETDB1 regulates cell proliferation and cellular invasion in lung cancer cell lines              |
| <b>Sun et al. 2015</b> [26]               | NSCLC cell lines: PC14, A549, HCC2279, H1299, H23 and HCC1975                                                                                                                                                                               | There is an inverse correlation between the protein levels of SETDB1 and TP53.<br>SETDB1 could promote oncogenesis through activation of the WNT pathway                                                                                                                                                                                                                            | qPCR, WB<br>Microarray, ChIP, WB, luciferase reporter assay                                                        | SETDB1 promotes lung carcinogenesis                                                              |
| <b>Na et al. 2018</b> [27]                | A549 NSCLC cell line                                                                                                                                                                                                                        | ERK2-SETDB1-FosB signaling pathway involved in transformation and migration activity of cancer cells during treatment                                                                                                                                                                                                                                                               | ChIP, RT-qPCR, CFA, WB, Scratch and cell migration assays                                                          | SETDB1 regulates the chemo-resistance during treatment                                           |
| <b>Chen et al. 2018</b> [28]              | NSCLC cell lines: A549 and PC14. Bronchial epithelial BEAS-2B cell line                                                                                                                                                                     | SETDB1 mRNA and protein levels were elevated in NSCLC cell lines compared to the normal epithelial cell line. SETDB1 promoted oncogenesis via TP53 and miR-29s repression                                                                                                                                                                                                           | RT-qPCR, WB, Luciferase reporter assay                                                                             | SETDB1 plays an oncogenic role in lung carcinogenesis                                            |
| <b>Emran et al. 2018</b> [29]             | A549 NSCLC cell line                                                                                                                                                                                                                        | Silencing of SETDB1 reversed multi-drug tolerance.                                                                                                                                                                                                                                                                                                                                  | RT-qPCR, WB                                                                                                        | SETDB1 regulates chemo-resistance during treatment                                               |
| <b>Wang et al. 2019</b> [30]              | A549 NSCLC cell line                                                                                                                                                                                                                        | SETDB1 promoted oncogenesis by methylation of Akt K64 and the Akt hyperactivation                                                                                                                                                                                                                                                                                                   | Colony formation assay, IP, WB, methylation assay                                                                  | SETDB1 accelerates oncogenesis                                                                   |
| <b>Noh et al. 2014</b> [31]               | A549 NSCLC cell line                                                                                                                                                                                                                        | Paclitaxel induced down-regulation of SETDB1 expression at transcriptional and protein levels                                                                                                                                                                                                                                                                                       | RT-qPCR and WB                                                                                                     | Potential of SETDB1 as target for anti-cancer drugs                                              |



## References

1. Okayama, H.; Kohno, T.; Ishii, Y.; Shimada, Y.; Shiraishi, K.; Iwakawa, R.; Furuta, K.; Tsuta, K.; Shibata, T.; Yamamoto, S.; et al. Identification of genes upregulated in ALK-positive and EGFR/KRAS/ALK-negative lung adenocarcinomas. *Cancer Res.* **2012**, *72*, 100–111.
2. Beer, D.G.; Kardia, S.L.R.; Huang, C.-C.; Giordano, T.J.; Levin, A.M.; Misek, D.E.; Lin, L.; Chen, G.; Gharib, T.G.; Thomas, D.G.; et al. Gene-expression profiles predict survival of patients with lung adenocarcinoma. *Nat. Med.* **2002**, *8*, 816–824.
3. Takeuchi, T.; Tomida, S.; Yatabe, Y.; Kosaka, T.; Osada, H.; Yanagisawa, K.; Mitsudomi, T.; Takahashi, T. Expression profile-defined classification of lung adenocarcinoma shows close relationship with underlying major genetic changes and clinicopathologic behaviors. *J. Clin. Oncol.* **2006**, *24*, 1679–1688.
4. Angulo, B.; Suarez-Gauthier, A.; Lopez-Rios, F.; Medina, P.P.; Conde, E.; Tang, M.; Soler, G.; Lopez-Encuentra, A.; Cigudosa, J.C.; Sanchez-Cespedes, M.; et al. Expression signatures in lung cancer reveal a profile for EGFR-mutant tumours and identify selective PIK3CA overexpression by gene amplification. *J. Pathol.* **2008**, *21*, 4347–4356.
5. Yu, G.; Herazo-Maya, J.D.; Nukui, T.; Romkes, M.; Parwani, A.; Juan-Guardela, B.M.; Robertson, J.; Gauldie, J.; Siegfried, J.M.; Kaminski, N.; et al. Matrix metalloproteinase-19 promotes metastatic behavior in vitro and is associated with increased mortality in non-small cell lung cancer. *Am. J. Respir. Crit. Care Med.* **2014**, *190*, 780–790.
6. Sato, M.; Larsen, J.E.; Lee, W.; Sun, H.; Shames, D.S.; Dalvi, M.P.; Ramirez, R.D.; Tang, H.; DiMaio, J.M.; Gao, B.; et al. Human lung epithelial cells progressed to malignancy through specific oncogenic manipulations. *Mol. Cancer Res.* **2013**, *11*, 638–650.
7. Riquelme, E.; Suraokar, M.; Behrens, C.; Lin, H.Y.; Girard, L.; Nilsson, M.B.; Simon, G.; Wang, J.; Coombes, K.R.; Lee, J.J.; et al. VEGF/VEGFR-2 upregulates EZH2 expression in lung adenocarcinoma cells and EZH2 depletion enhances the response to platinum-based and VEGFR-2-targeted therapy. *Clin. Cancer Res.* **2014**, *20*, 3849–3861.
8. Girard, L.; Rodriguez-Canales, J.; Behrens, C.; Thompson, D.M.; Botros, I.W.; Tang, H.; Xie, Y.; Rekhman, N.; Travis, W.D.; Wistuba, I.I.; et al. An Expression Signature as an Aid to the Histologic Classification of Non-Small Cell Lung Cancer. *Clin. Cancer Res.* **2016**, *22*, 4880–4889.
9. Parra, E.R.; Behrens, C.; Rodriguez-Canales, J.; Lin, H.; Mino, B.; Blando, J.; Zhang, J.; Gibbons, D.L.; Heymach, J.V.; Sepesi, B.; et al. Image Analysis-based Assessment of PD-L1 and Tumor-Associated Immune Cells Density Supports Distinct Intratumoral Microenvironment Groups in Non-small Cell Lung Carcinoma Patients. *Clin. Cancer Res.* **2016**, *22*, 6278–6289.
10. Der, S.D.; Sykes, J.; Pintilie, M.; Zhu, C.-Q.; Strumpf, D.; Liu, N.; Jurisica, I.; Shepherd, F.A.; Tsao, M.S. Validation of a histology-independent prognostic gene signature for early-stage, non-small-cell lung cancer including stage IA patients. *J. Thorac. Oncol.* **2014**, *9*, 59–64.
11. Director's Challenge Consortium for the Molecular Classification of Lung Adenocarcinoma; Shedden, K.; Taylor, J.M.G.; Enkemann, S.A.; Tsao, M.-S.; Yeatman, T.J.; Gerald, W.L.; Eschrich, S.; Jurisica, I.; Giordano, T.J.; et al. Gene expression-based survival prediction in lung adenocarcinoma: A multi-site, blinded validation study. *Nat. Med.* **2008**, *14*, 822–827.
12. Staaf, J.; Jönsson, G.; Jönsson, M.; Karlsson, A.; Isaksson, S.; Salomonsson, A.; Pettersson, H.M.; Soller, M.; Ewers, S.B.; Johansson, L.; et al. Relation between smoking history and gene expression profiles in lung adenocarcinomas. *BMC Med. Genomics* **2012**, *5*, 22.
13. Bjaanæs, M.M.; Fleischer, T.; Halvorsen, A.R.; Daunay, A.; Busato, F.; Solberg, S.; Jørgensen, L.; Kure, E.; Edvardsen, H.; Børresen-Dale, A.L.; et al. Genome-wide DNA methylation analyses in lung adenocarcinomas: Association with EGFR, KRAS and TP53 mutation status, gene expression and prognosis. *Mol. Oncol.* **2016**, *10*, 330–343.
14. Wright, C.M.; Savarimuthu Francis, S.M.; Tan, M.E.; Martins, M.U.; Winterford, C.; Davidson, M.R.; Duhig, E.E.; Clarke, B.E.; Hayward, N.K.; Yang, I.A.; et al. MS4A1 dysregulation in asbestos-related lung squamous cell carcinoma is due to CD20 stromal lymphocyte expression. *PLoS ONE* **2012**, *7*, e34943, doi:10.1371/journal.pone.0034943.
15. Tomida, S.; Takeuchi, T.; Shimada, Y.; Arima, C.; Matsuo, K.; Mitsudomi, T.; Yatabe, Y.; Takahashi, T. Relapse-related molecular signature in lung adenocarcinomas identifies patients with dismal prognosis. *J. Clin. Oncol.* **2009**, *27*, 2793–2799.
16. Wilkerson, M.D.; Yin, X.; Walter, V.; Zhao, N.; Cabanski, C.R.; Hayward, M.C.; Miller, C.R.; Socinski, M.A.;

- Parsons, A.M.; Thorne, L.B.; et al. Differential pathogenesis of lung adenocarcinoma subtypes involving sequence mutations, copy number, chromosomal instability, and methylation. *PLoS ONE* **2012**, *7*, e36530, doi:10.1371/journal.pone.0036530.
17. Zhu, C.-Q.; Ding, K.; Strumpf, D.; Weir, B.A.; Meyerson, M.; Pennell, N.; Thomas, R.K.; Naoki, K.; Ladd-Acosta, C.; Liu, N.; et al. Prognostic and predictive gene signature for adjuvant chemotherapy in resected non-small-cell lung cancer. *J. Clin. Oncol.* **2010**, *28*, 4417–4424.
  18. Botling, J.; Edlund, K.; Lohr, M.; Hellwig, B.; Holmberg, L.; Lambe, M.; Berglund, A.; Ekman, S.; Bergqvist, M.; Pontén, F.; et al. Biomarker discovery in non-small cell lung cancer: Integrating gene expression profiling, meta-analysis, and tissue microarray validation. *Clin. Cancer Res.* **2013**, *19*, 194–204.
  19. Weber, R.; Meister, M.; Muley, T.; Thomas, M.; Sültmann, H.; Warth, A.; Winter, H.; Herth, F.J.F.; Schneider, M.A. Pathways regulating the expression of the immunomodulatory protein glycodelin in non-small cell lung cancer. *Int. J. Oncol.* **2019**, *54*, 515–526.
  20. Xie, Y.; Xiao, G.; Coombes, K.R.; Behrens, C.; Solis, L.M.; Raso, G.; Girard, L.; Erickson, H.S.; Roth, J.; Heymach, J.V.; et al. Robust gene expression signature from formalin-fixed paraffin-embedded samples predicts prognosis of non-small-cell lung cancer patients. *Clin. Cancer Res.* **2011**, *17*, 5705–5714.
  21. Larsen, J.E.; Pavey, S.J.; Passmore, L.H.; Bowman, R.; Clarke, B.E.; Hayward, N.K.; Fong, K.M. Expression profiling defines a recurrence signature in lung squamous cell carcinoma. *Carcinogenesis* **2007**, *28*, 760–766.
  22. Watanabe, H.; Soejima, K.; Yasuda, H.; Kawada, I.; Nakachi, I.; Yoda, S.; Naoki, K.; Ishizaka, A. Deregulation of histone lysine methyltransferases contributes to oncogenic transformation of human bronchoepithelial cells. *Cancer Cell Int.* **2008**, *8*, 15.
  23. Lee, J.-K.; Kim, K.-C. DZNep, inhibitor of S-adenosylhomocysteine hydrolase, down-regulates expression of SETDB1 H3K9me3 HMTase in human lung cancer cells. *Biochem. Biophys. Res. Commun.* **2013**, *438*, 647–652.
  24. Wu, P.C.; Lu, J.W.; Yang, J.Y.; Lin, I.H.; Ou, D.L.; Lin, Y.H.; Chou, K.H.; Huang, W.F.; Wang, W.P.; Huang, Y.L.; et al. H3K9 histone methyltransferase, KMT1E/SETDB1, cooperates with the SMAD2/3 pathway to suppress lung cancer metastasis. *Cancer Res.* **2014**, *74*, 7333–7343.
  25. Rodriguez-Paredes, M.; Martinez de Paz, A.; Simó-Riudalbas, L.; Sayols, S.; Moutinho, C.; Moran, S.; Villanueva, A.; Vázquez-Cedeira, M.; Lazo, P.A.; Carneiro, F.; et al. Gene amplification of the histone methyltransferase SETDB1 contributes to human lung tumorigenesis. *Oncogene* **2014**, *33*, 2807–2813.
  26. Sun, Q.Y.; Ding, L.W.; Xiao, J.F.; Chien, W.; Lim, S.L.; Hattori, N.; Goodglick, L.; Chia, D.; Mah, V.; Alavi, M.; et al. SETDB1 accelerates tumorigenesis by regulating the WNT signalling pathway. *J. Pathol.* **2015**, *235*, 559–570.
  27. Na, H.H.; Kim, K.C. SETDB1-mediated FosB regulation via ERK2 is associated with an increase in cell invasiveness during anticancer drug treatment of A549 human lung cancer cells. *Biochem Biophys Res. Commun.* **2018**, *495*, 512–518.
  28. Chen, B.; Wang, J.; Wang, J.; Wang, H.; Gu, X.; Tang, L.; Feng, X. A regulatory circuitry comprising TP53, miR-29 family, and SETDB1 in non-small cell lung cancer. *Biosci. Rep.* **2018**, *38*, doi:10.1042/BSR20180678.
  29. Al Emran, A.; Marzese, D.M.; Menon, D.R.; Stark, M.S.; Torrano, J.; Hammerlindl, H.; Zhang, G.; Brafford, P.; Salomon, M.P.; Nelson, N.; et al. Distinct histone modifications denote early stress-induced drug tolerance in cancer. *Oncotarget* **2018**, *9*, 8206–8222.
  30. Wang, G.; Long, J.; Gao, Y.; Zhang, W.; Han, F.; Xu, C.; Sun, L.; Yang, S.C.; Lan, J.; Hou, Z.; et al. SETDB1-mediated methylation of Akt promotes its K63-linked ubiquitination and activation leading to tumorigenesis. *Nat. Cell Biol.* **2019**, *21*, 214–225.
  31. Noh, H.-J., Kim K-A, Kim K-C. p53 down-regulates SETDB1 gene expression during paclitaxel induced-cell death. *Biochem. Biophys. Res. Commun.* **2014**, *446*, 43–48.

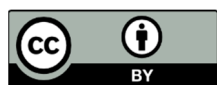

Supplement: cancers-11-01134-s001.pdf [file cancers-11-01134-s001.pdf]
